# Supplementary material
Source: Springer Nature journal article supplement (https://www.springermedizin.de/resource/supplementary/12906_2013_2123_MOESM1_ESM.pdf/9523676)
Supplement: MOESM1 [file 9523676]

## ADDITIONAL FILE 1

**Chemical composition, antinociceptive, anti-inflammatory and redox properties *in vitro* of the essential oil from *Remirea maritima* Aubl. (Cyperaceae)**

**Alessandra Silva Rabelo<sup>1</sup>, Mairim Russo Serafini<sup>\*1</sup>, Thallita Kelly Rabelo<sup>1</sup>, Marcelia Garcez Dória de Melo<sup>1</sup>, Douglas da Silva Prado<sup>1</sup>, Daniel Pens Gelain<sup>2</sup>, José Claudio Fonseca Moreira<sup>2</sup>, Marília dos Santos Bezerra<sup>1</sup>, Thanany Brasil da Silva<sup>3</sup>, Emmanoel Vilaça Costa<sup>3</sup>, Paulo Cesar de Lima Nogueira<sup>3</sup>, Valéria Regina de Souza Moraes<sup>3</sup>, Ana Paula do Nascimento Prata<sup>4</sup>, Lucindo José Quintans-Júnior<sup>1</sup>, and Adriano Antunes Souza Araújo<sup>1\*</sup>**

<sup>1</sup> *Laboratório de Ensaio Farmacêuticos e Toxicidade, Universidade Federal de Sergipe (LeFT/UFS), 49100-000, São Cristóvão, Sergipe, Brazil*

<sup>2</sup> *Centro de Estudos em Estresse Oxidativo, Departamento de Bioquímica, Instituto de Ciências Básicas da Saúde, Universidade Federal do Rio Grande do Sul, 13083-970, Porto Alegre, Rio Grande do Sul, Brazil*

<sup>3</sup> *Laboratório de Pesquisa em Química Orgânica de Sergipe (LABORGANICS), Departamento de Química, Universidade Federal de Sergipe, 49100-000, São Cristóvão, Sergipe, Brazil*

<sup>4</sup> *Laboratório de Sistemática Vegetal, Departamento de Biologia, Universidade Federal de Sergipe, 49100-000, São Cristóvão, Sergipe, Brazil*

---

\*e-mail: maiserafini@hotmail.com

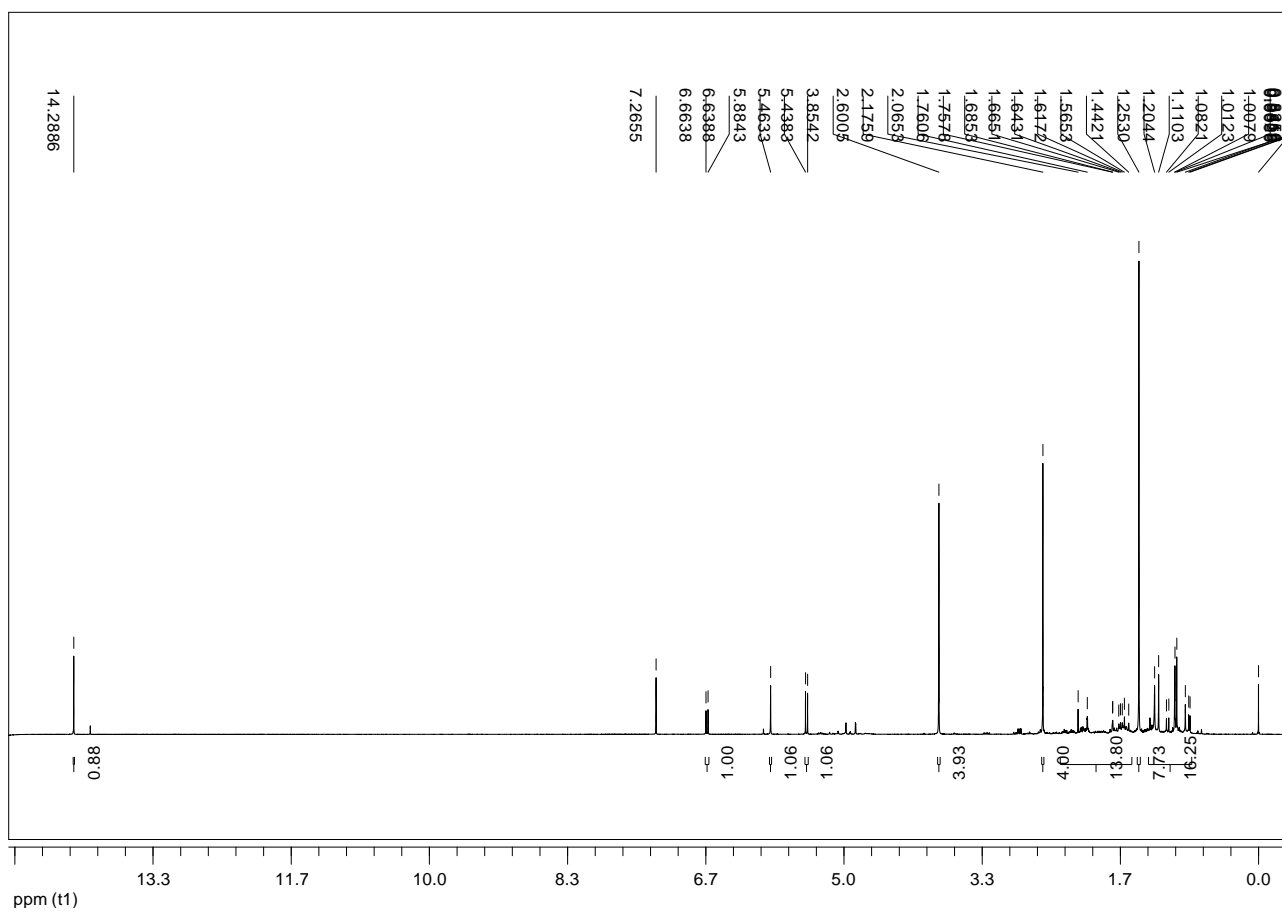

**Figure 1S.**  $^1\text{H}$  NMR spectrum of compound **1** (*iso*-evodionol) in  $\text{CDCl}_3$  at 400 MHz.

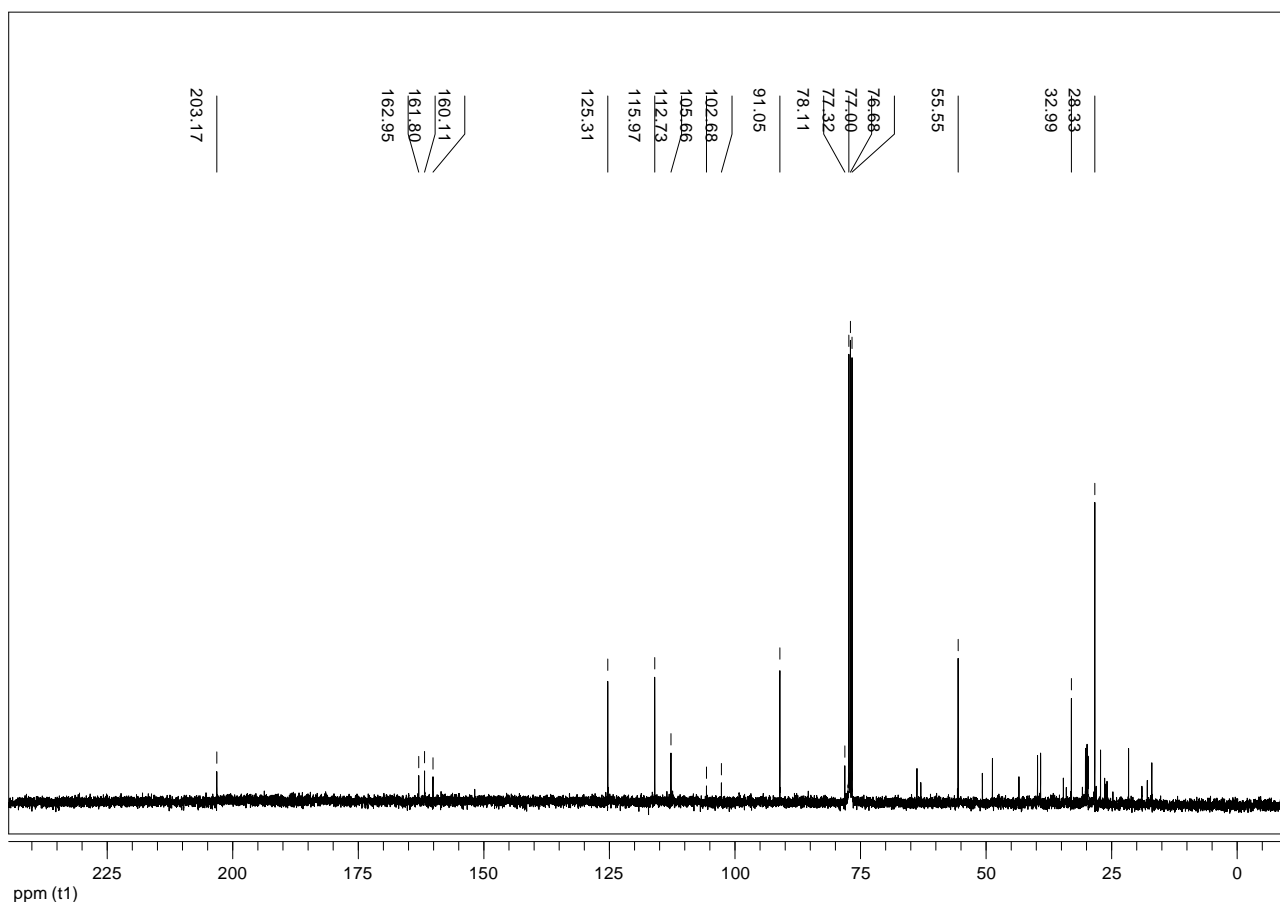

**Figure 2S.**  $^{13}\text{C}\{^1\text{H}\}$  spectrum of compound **1** (*iso*-evodionol) in  $\text{CDCl}_3$  at 100 MHz.

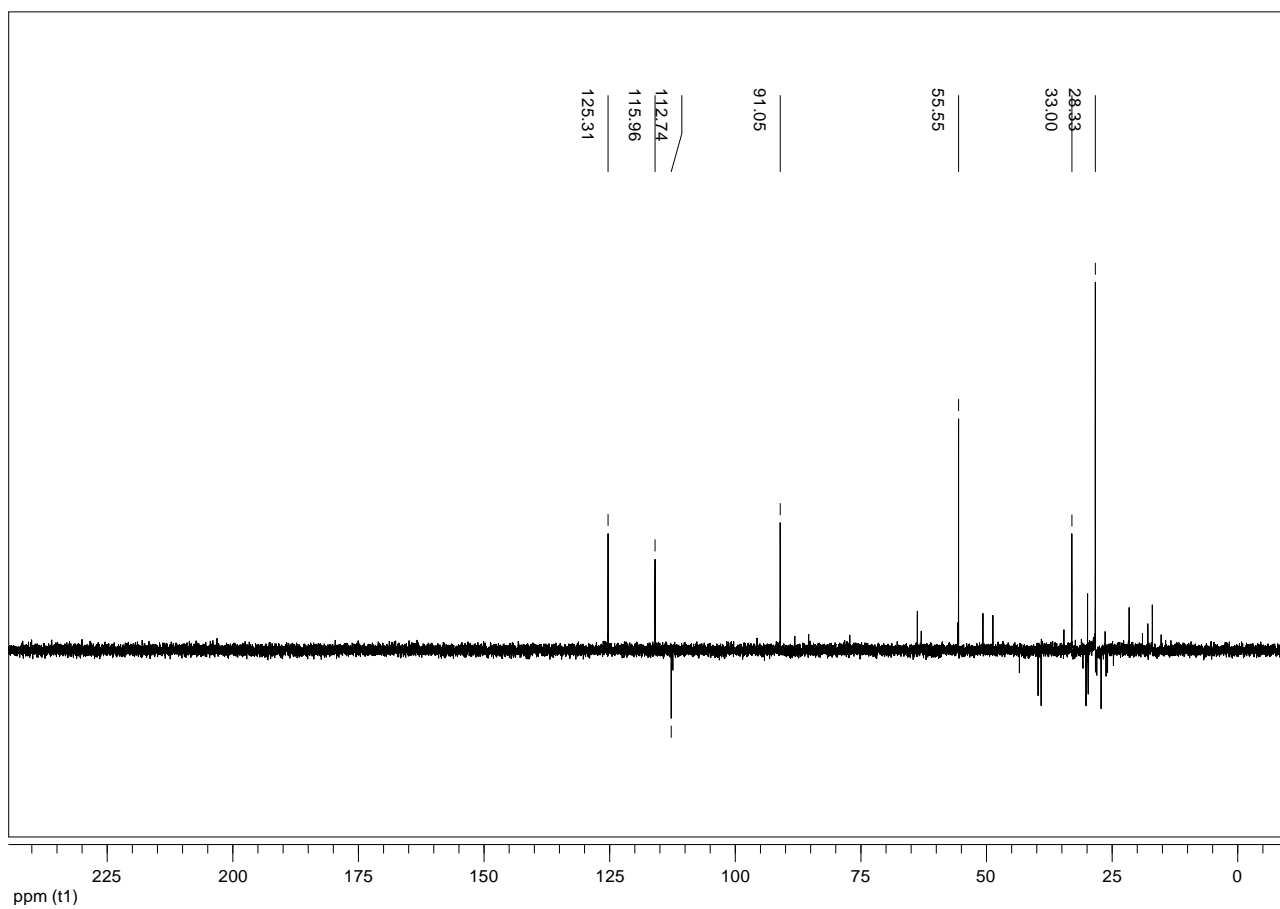

**Figure 3S.** DEPT 135 NMR spectrum of compound **1** (*iso*-evodionol) in CDCl<sub>3</sub> at 100 MHz.

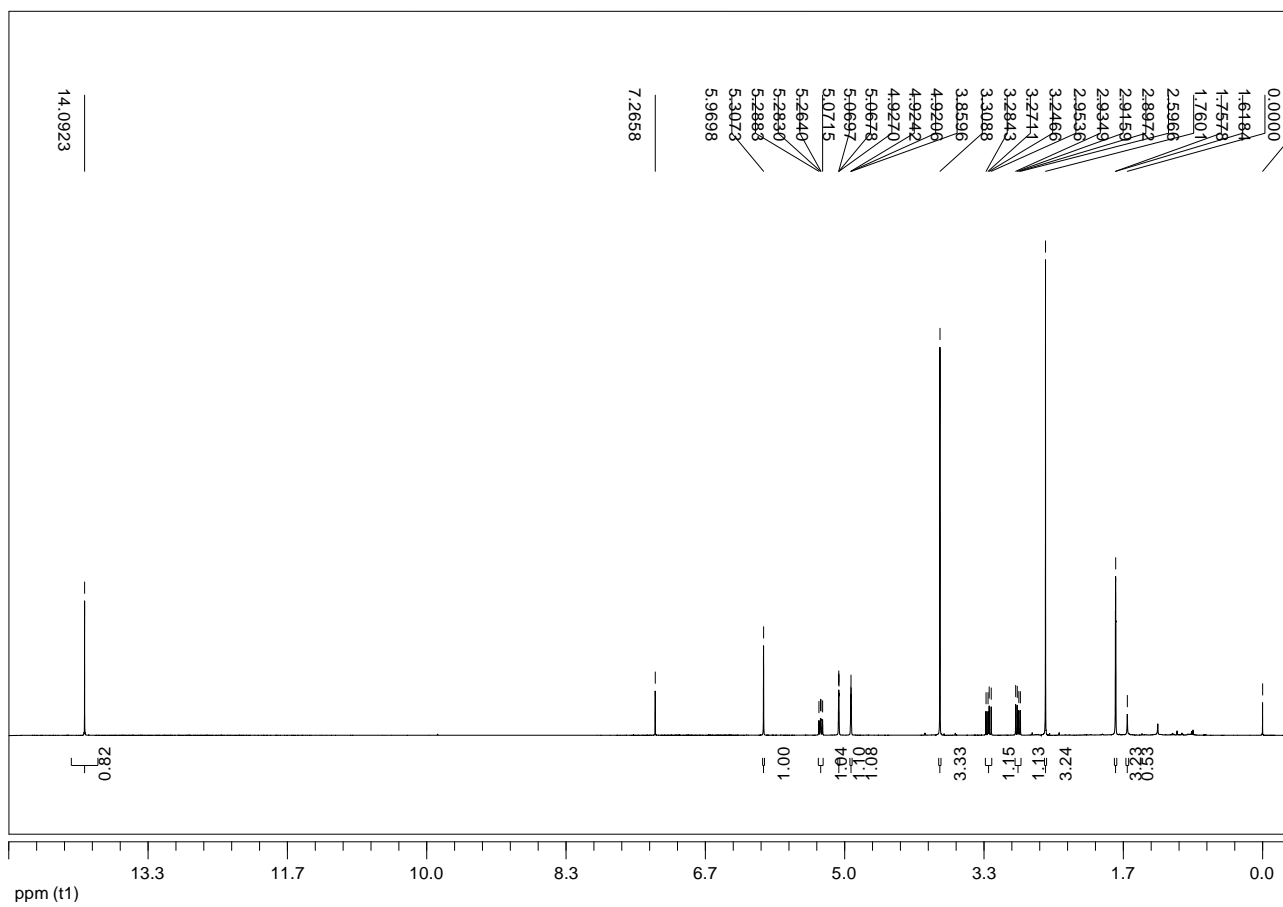

**Figure 4S.** <sup>1</sup>H NMR spectrum of compound 2 (remirol) in CDCl<sub>3</sub> at 400 MHz.

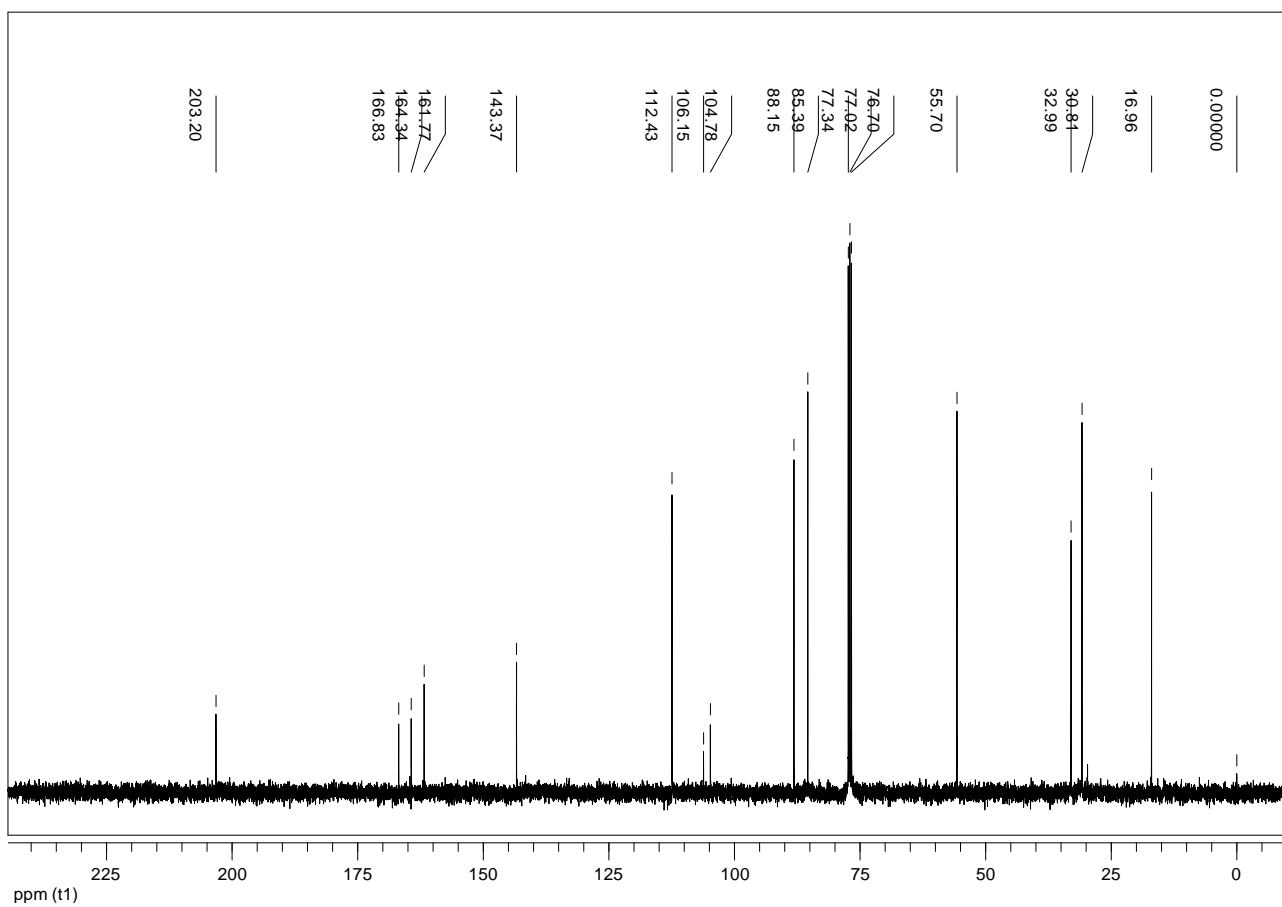

**Figure 5S.**  $^{13}\text{C}\{^1\text{H}\}$  spectrum of compound **2** (remirol) in  $\text{CDCl}_3$  at 100 MHz.

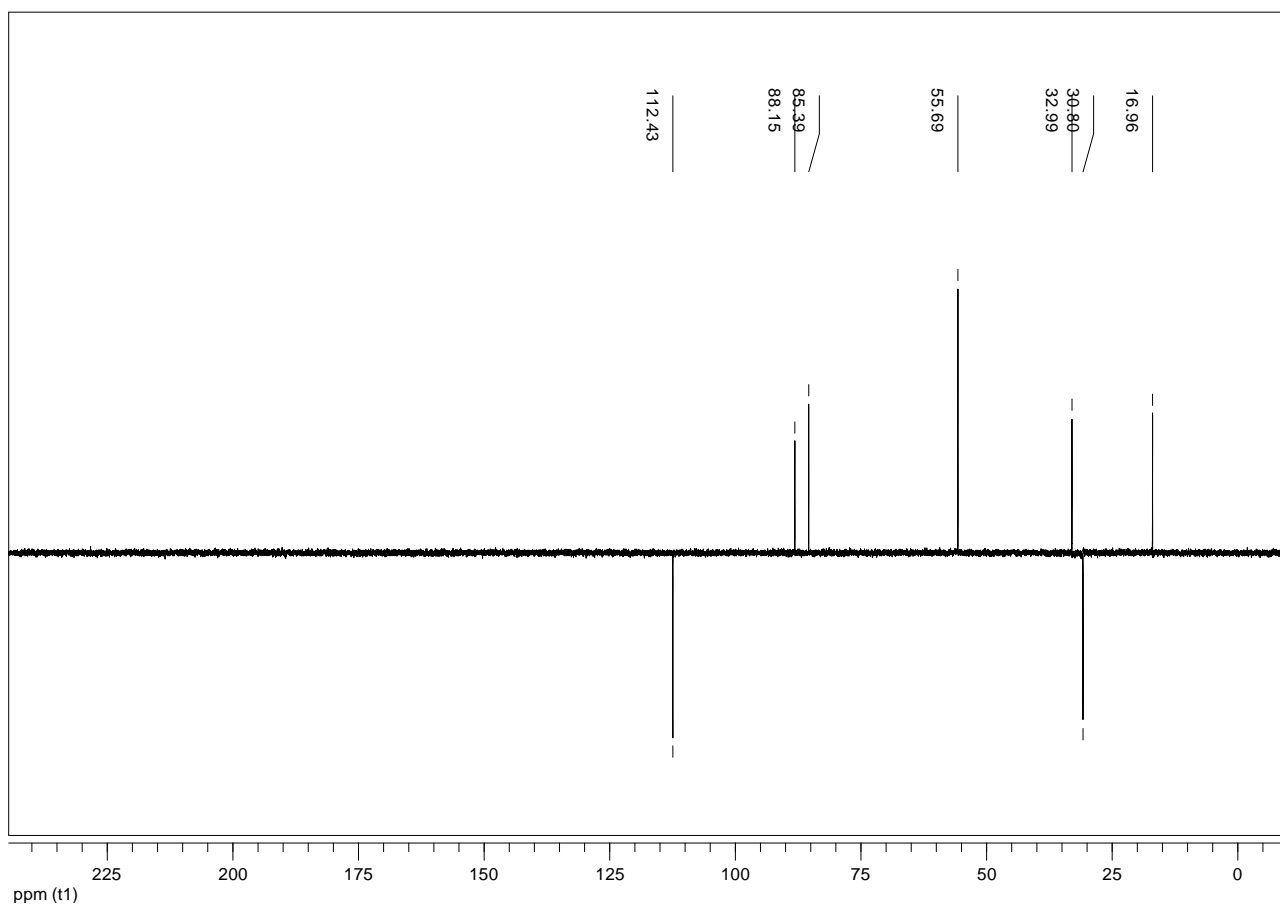

**Figure 6S.** DEPT 135 NMR spectrum of compound **2** (remirol) in CDCl<sub>3</sub> at 100 MHz.





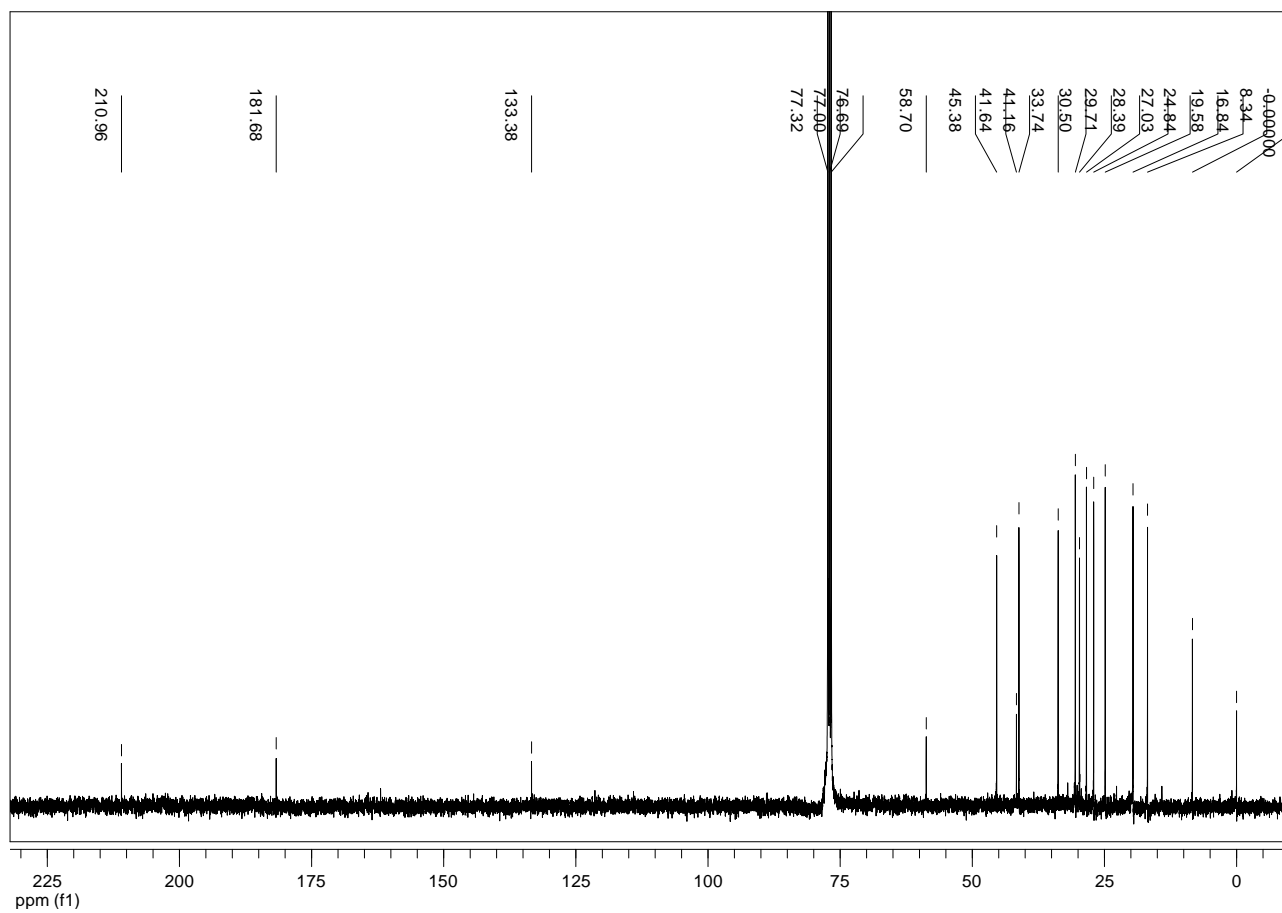

**Figure 8S.**  $^{13}\text{C}\{^1\text{H}\}$  spectrum of compound **3** (cyperotundone) in  $\text{CDCl}_3$  at 100 MHz.
